# Supplementary figures and images for: Pyrvinium targets autophagy addiction to promote cancer cell death
Source: PubMed Central journal article supplement — Cell Death Dis. 2013 May 2;4(5):e614–. doi: 10.1038/cddis.2013.142 (PMC3674351; doi:10.1038/cddis.2013.142), 2013-05-02

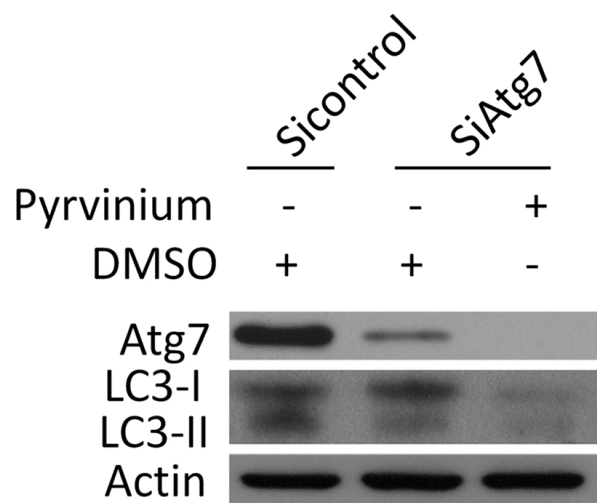

a

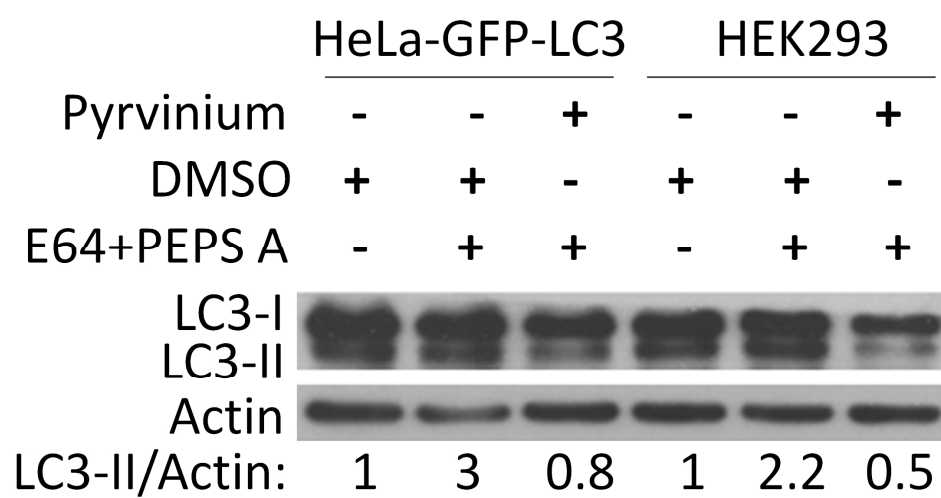

b

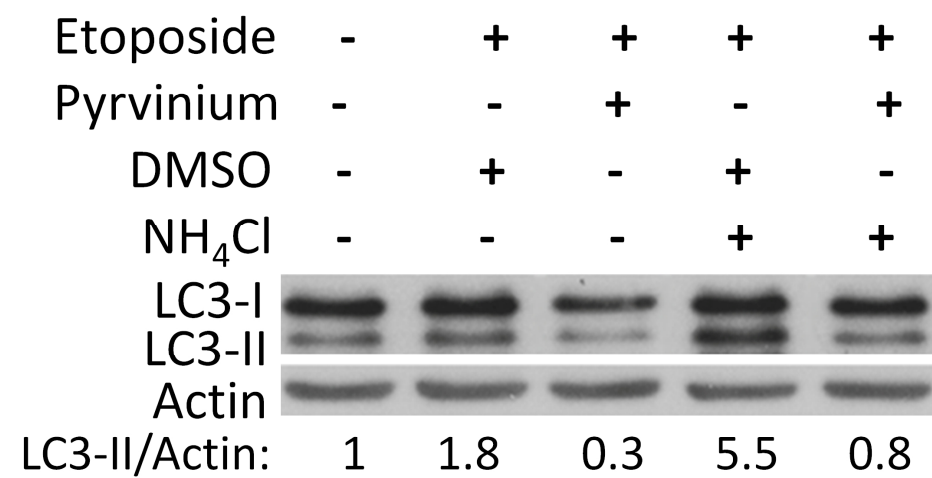

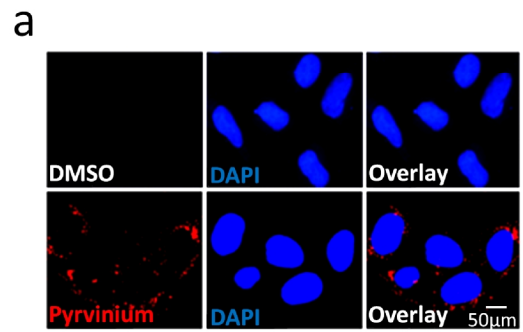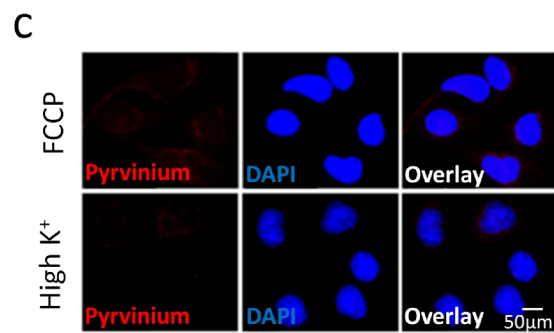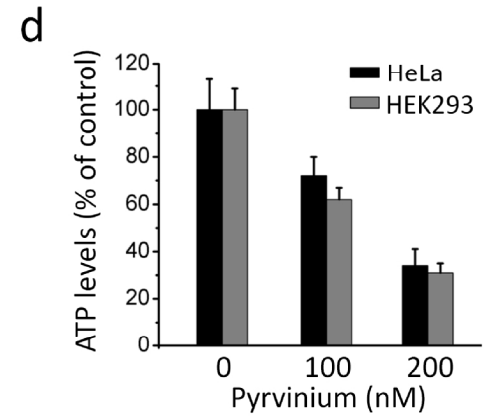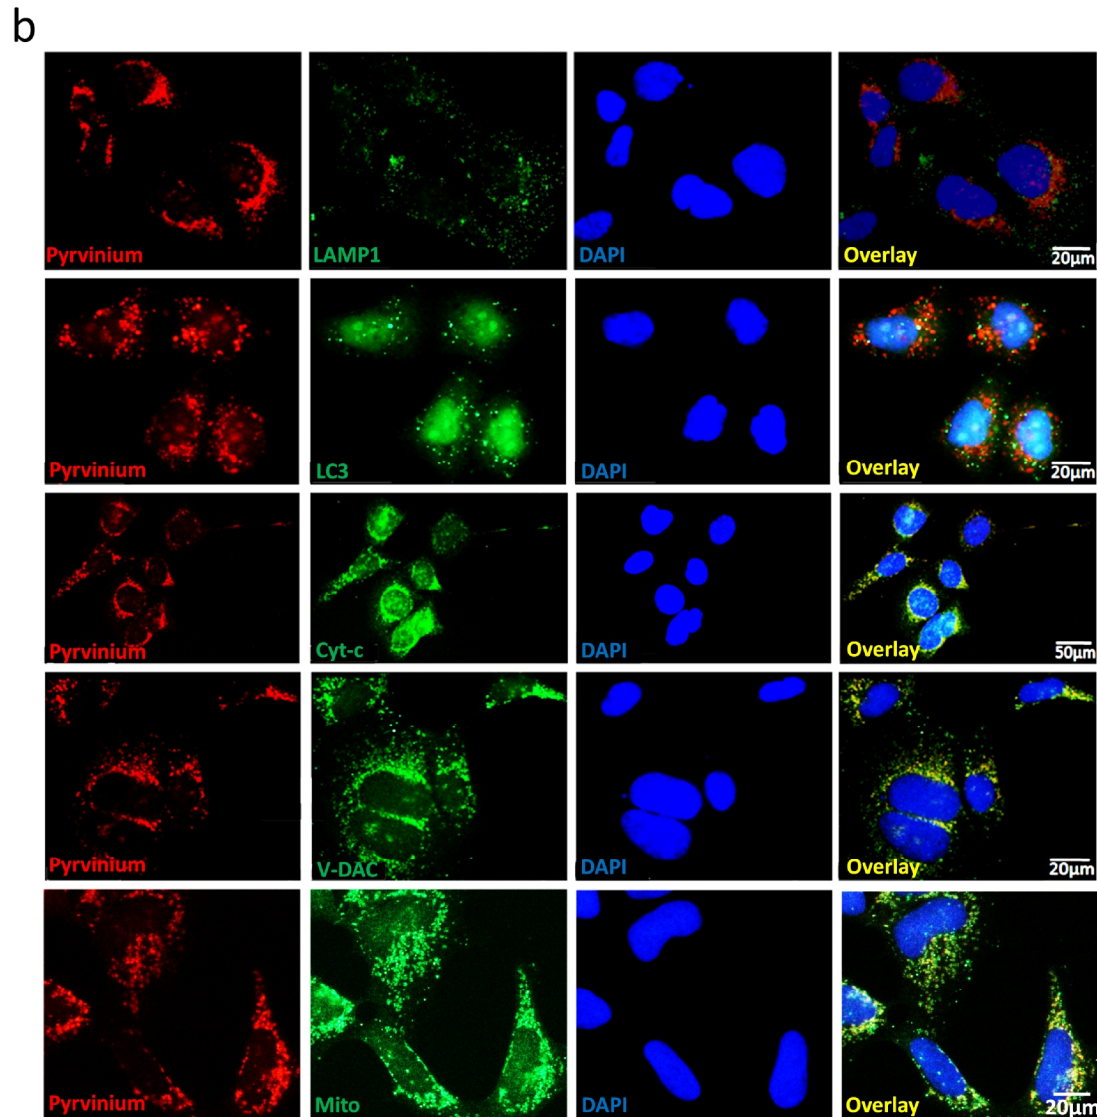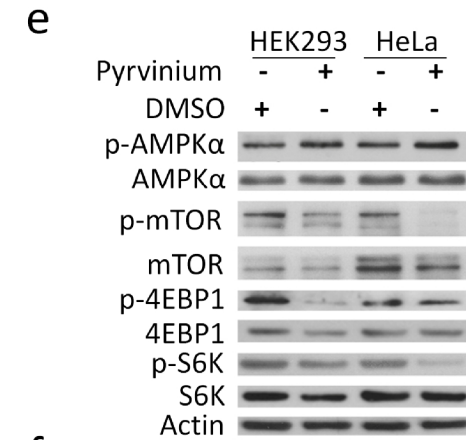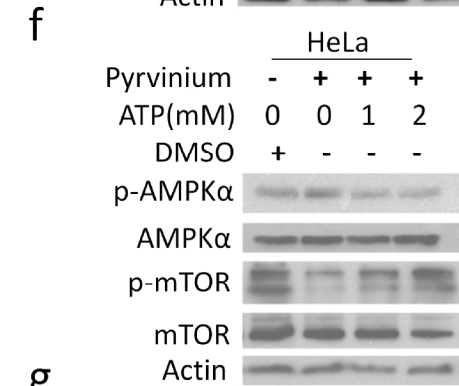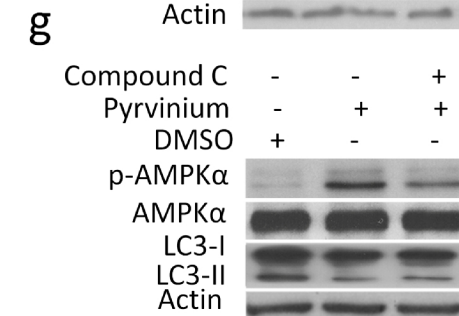

**a**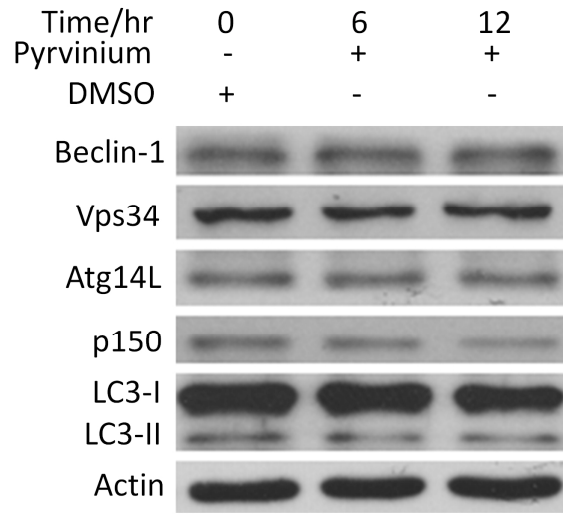**b**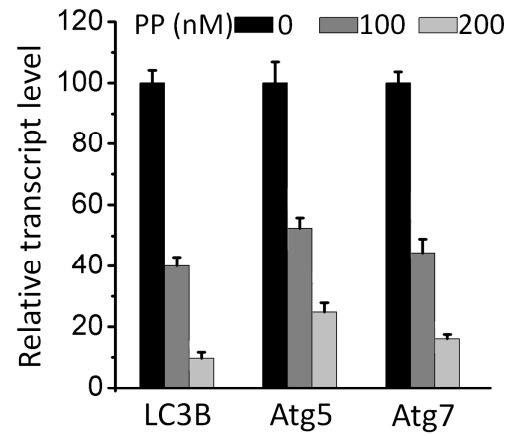**c**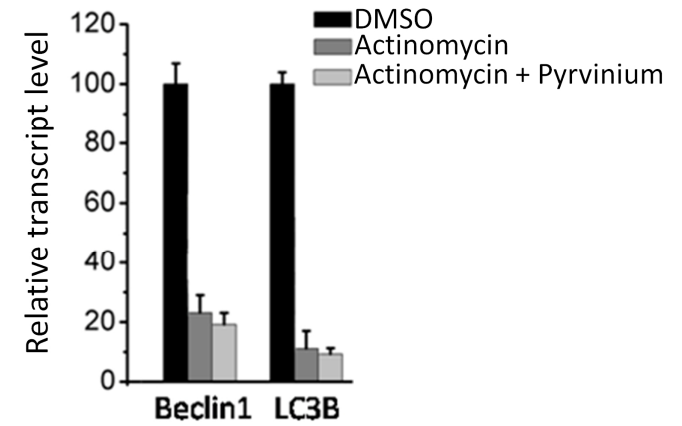**d**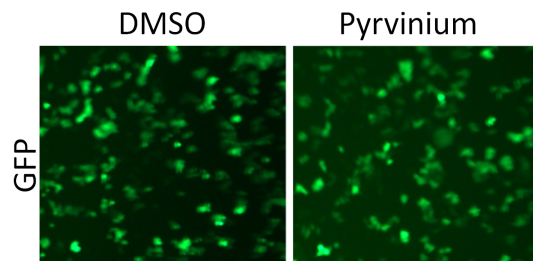**e**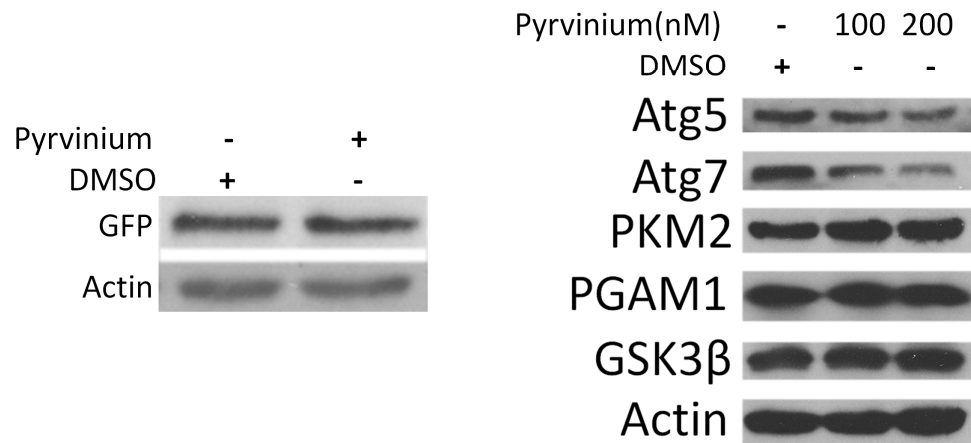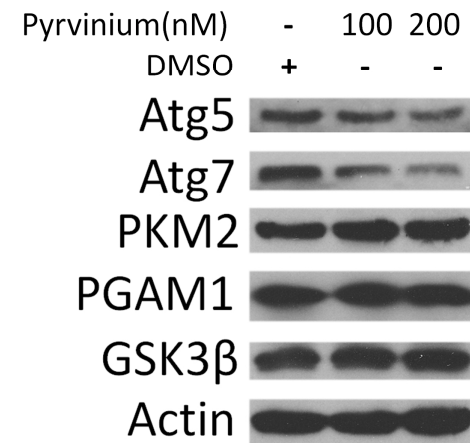



**a**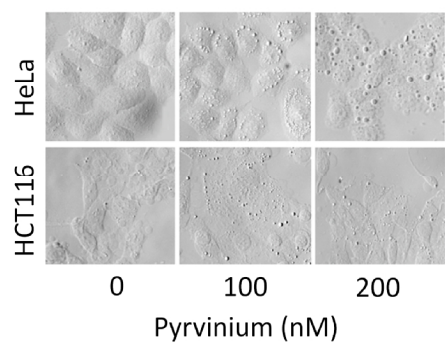**b**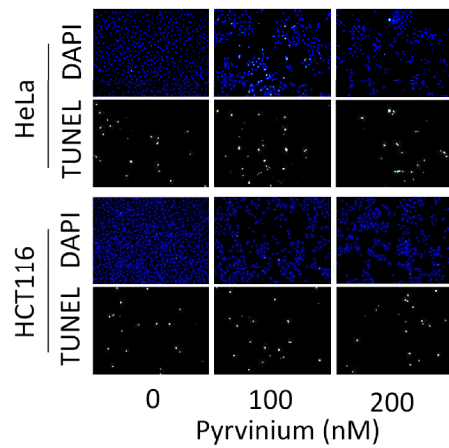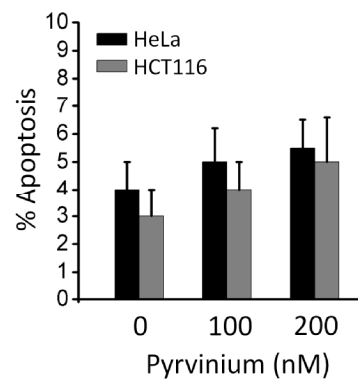**e**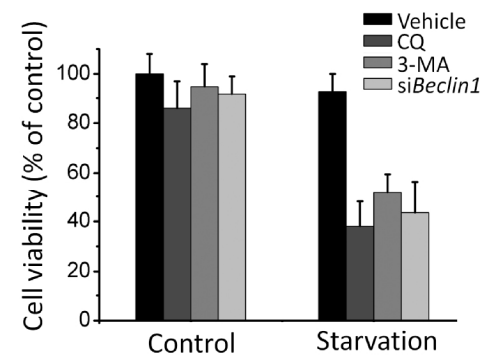**c**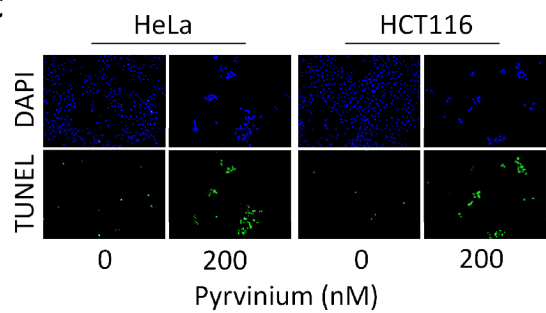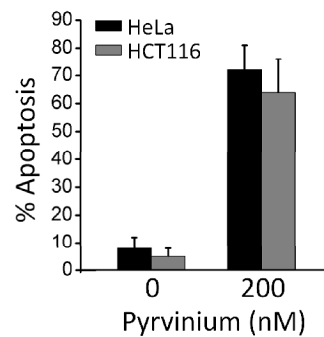**d**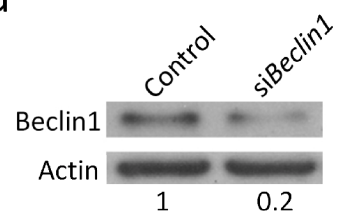

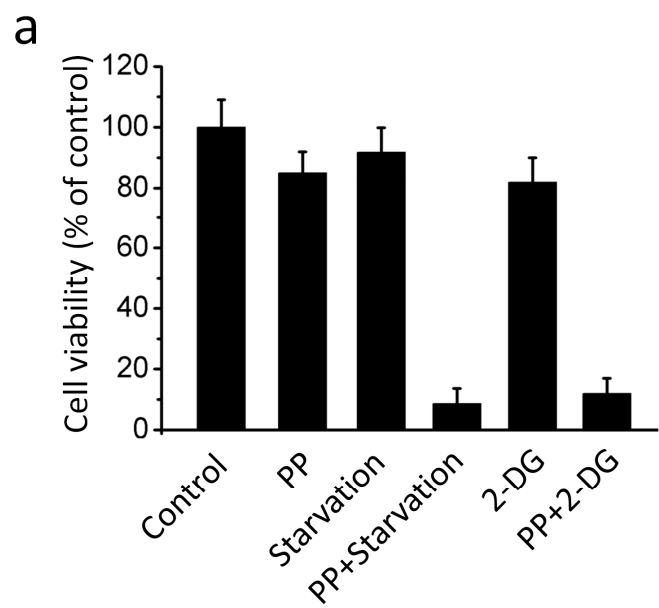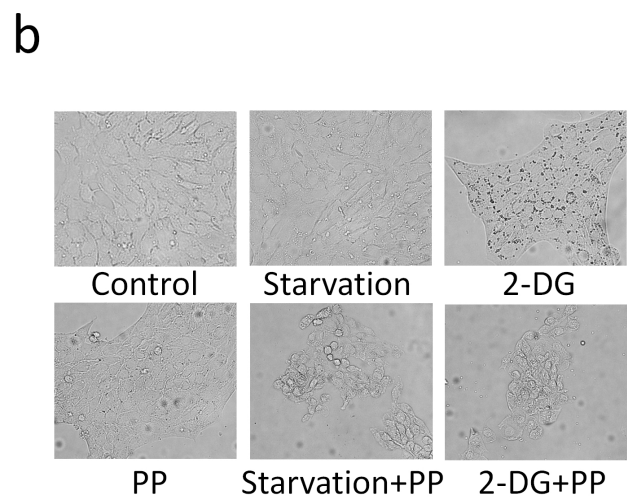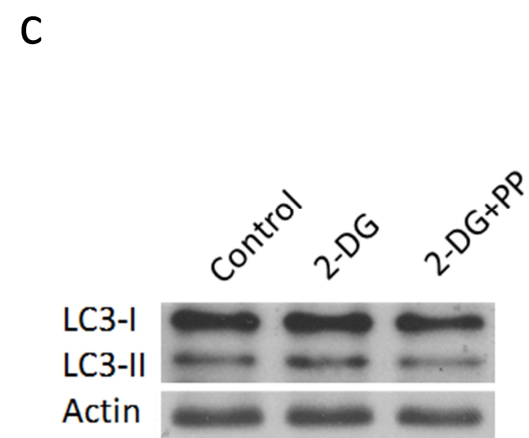

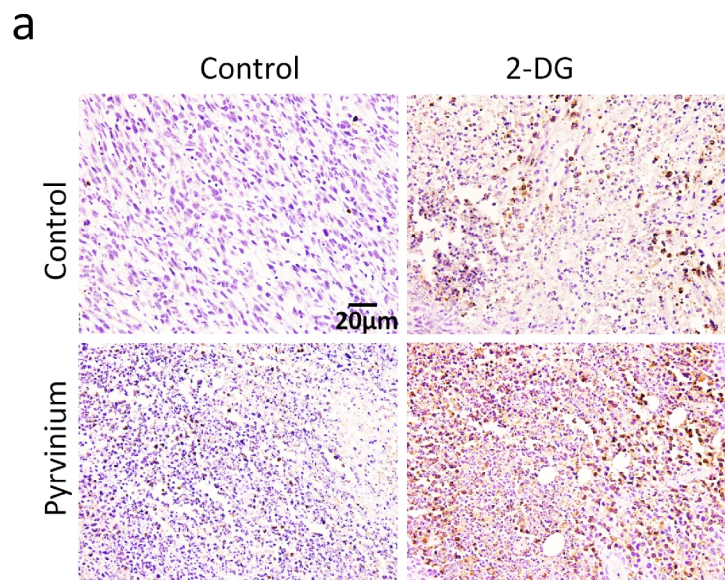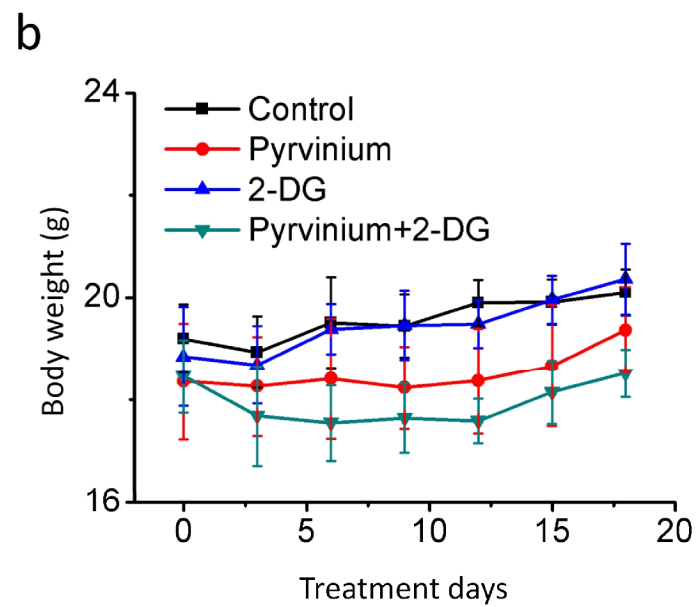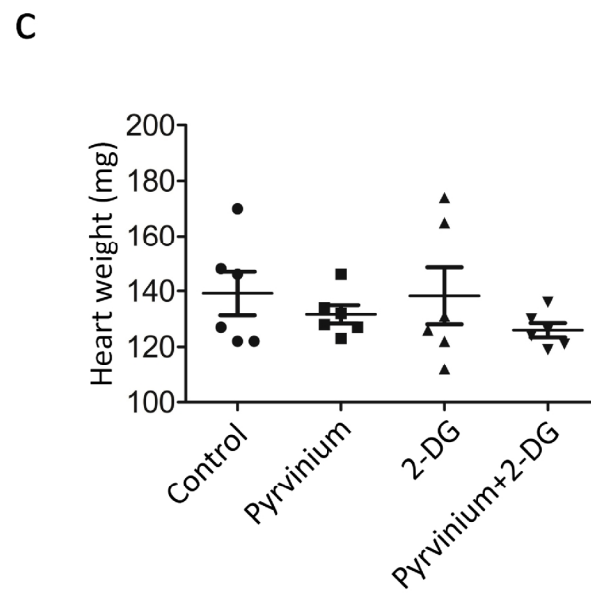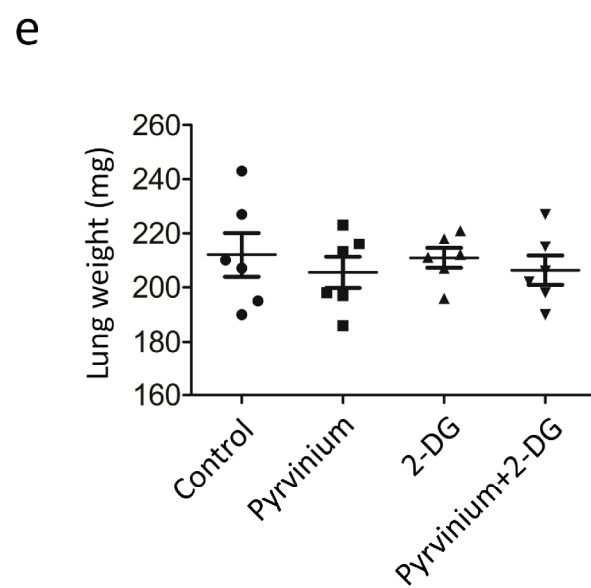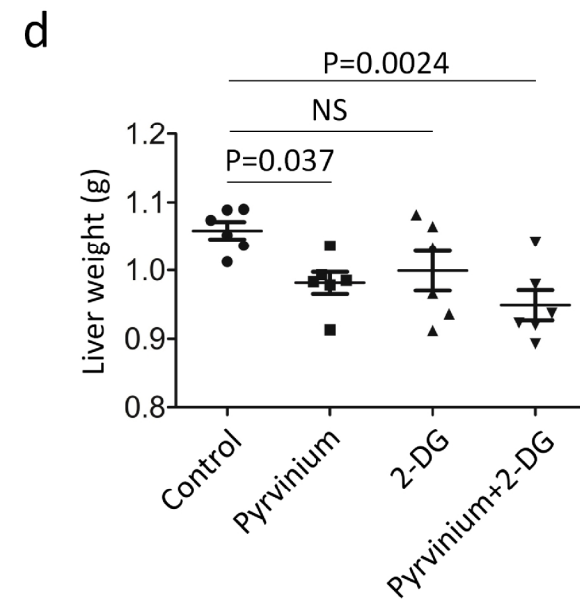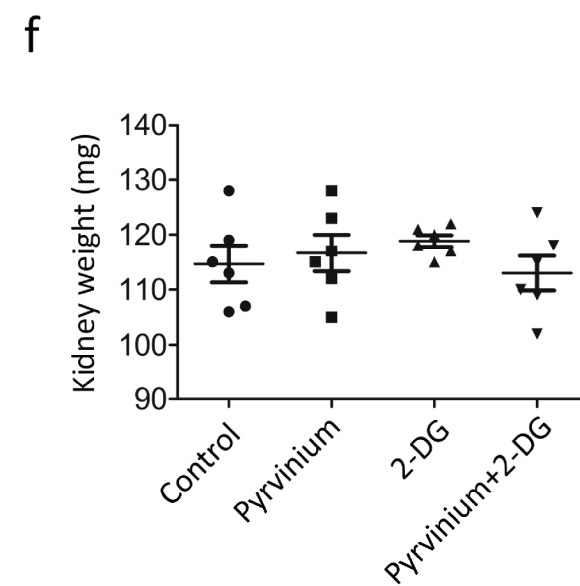



σσ

Control

2-DG

Pyrvinium

Pyrvinium + 2-DG

Liver

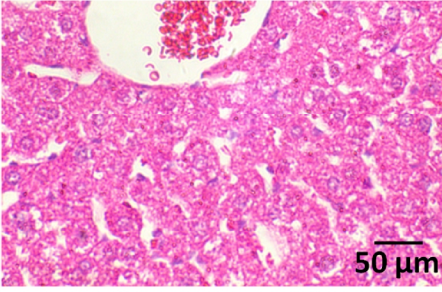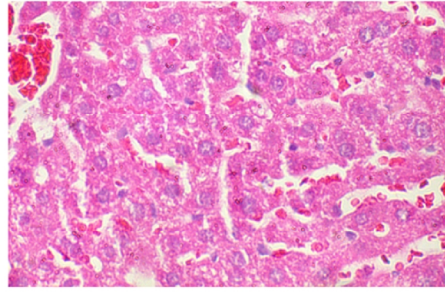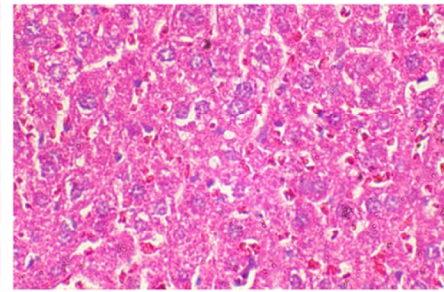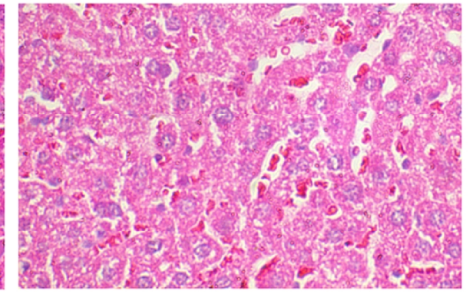

Heart

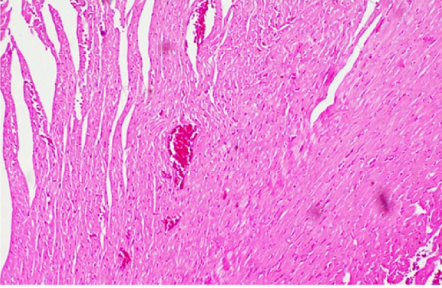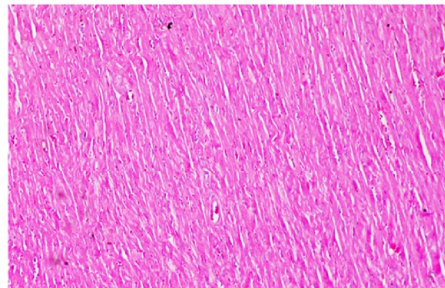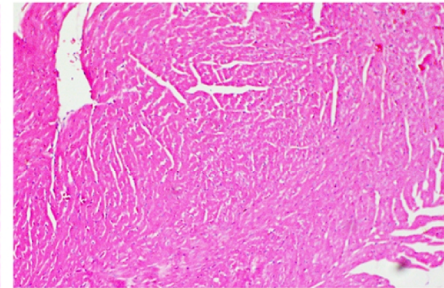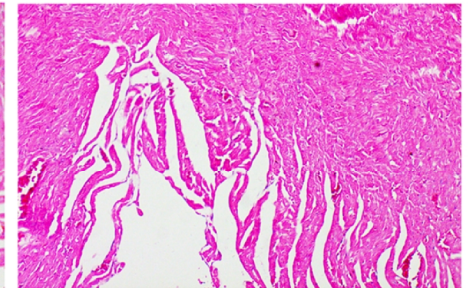

Lung

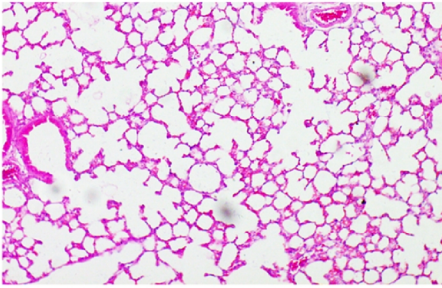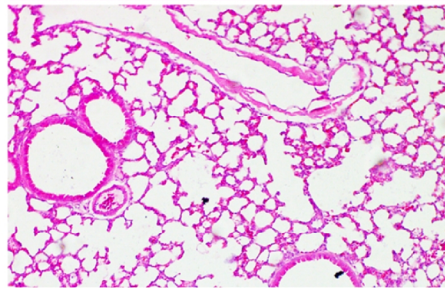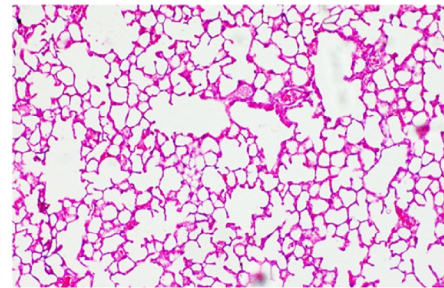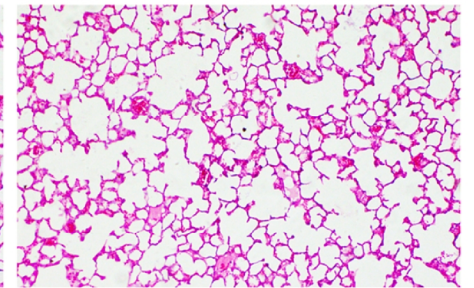

Kidney

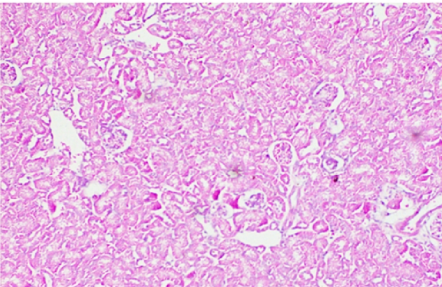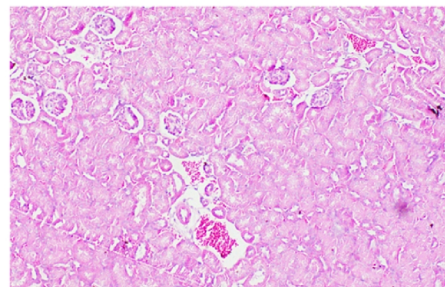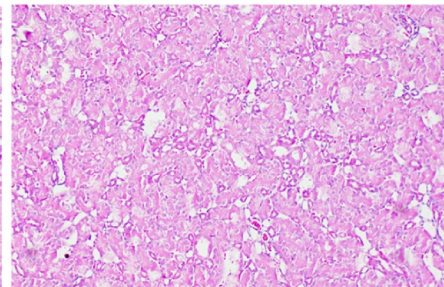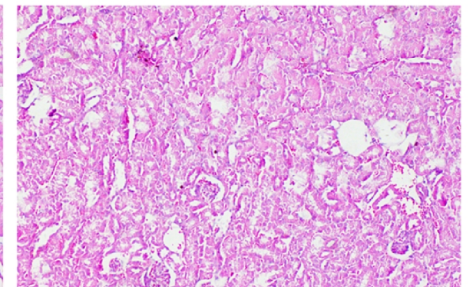

Supplement: cddis2013142x1.pdf [file cddis2013142x1.pdf]
